# Supplementary material for: BST-2 promotes survival in circulation and pulmonary metastatic seeding of breast cancer cells
Source: PubMed Central journal article supplement (PMC6279795; doi:10.1038/s41598-018-35710-y), 2018-12-04
Supplement: 41598_2018_35710_MOESM2_ESM.pdf [file 41598_2018_35710_MOESM2_ESM.pdf]

1 **BST-2 promotes survival in circulation and pulmonary metastatic seeding of breast cancer cells**

2  
3 Wadie D Mahauad-Fernandez<sup>1</sup>, Wasifa Naushad<sup>1</sup>, Tyler D Panzner<sup>2</sup>, Amani Bashir<sup>3</sup>, Geeta Lal<sup>4</sup>, Chioma M  
4 Okeoma<sup>\*1</sup>

5  
6 <sup>1</sup>Department of Microbiology and Immunology, Carver College of Medicine, University of Iowa, Iowa City, IA  
7 52242-1109, USA

8 <sup>2</sup>Department of Pharmacology, Stony Brook University, Stony Brook, NY 11794-8651, USA

9 <sup>3</sup>Department of Pathology, University of Iowa Hospitals and Clinics, Iowa City, IA 52242-1089, USA

10 <sup>4</sup>Department of Surgery, University of Iowa, 1500 John Colloton Pavilion, 200 Hawkins Drive, Iowa City, IA  
11 52242-1089, USA

12  
13 Wadie D Mahauad-Fernandez - Email: [wmahauad@stanford.edu](mailto:wmahauad@stanford.edu)

14 [Present address:](#) Division of Oncology, Departments of Medicine and Pathology, Stanford University School of  
15 Medicine, 291 Campus Drive, Stanford, CA 94305, USA

16  
17 Wasifa Naushad - Email: [wasifa.naushad@gmail.com](mailto:wasifa.naushad@gmail.com)

18 [Present address:](#) Atta-ur-Rahman School of Applied Bio sciences, National University of Sciences and  
19 Technology, Islamabad, Pakistan

20  
21 Tyler D Panzner - Email: [tyler.panzner@stonybrook.edu](mailto:tyler.panzner@stonybrook.edu)

22  
23 Amani Bashir - Email: [bashira@healthcare.uiowa.edu](mailto:bashira@healthcare.uiowa.edu)

24  
25 Geeta Lal - Email: [geeta-lal@uiowa.edu](mailto:geeta-lal@uiowa.edu)

28 \*Corresponding author - Chioma M Okeoma

29 Email: [chioma.okeoma@stonybrook.edu](mailto:chioma.okeoma@stonybrook.edu)

30 [Present address: Department of Pharmacology, Stony Brook University, 101 Nicolls Rd, Stony Brook, NY](#)  
31 [11794-8651, USA](#)

32

33 **Key words:** BST-2, Extracellular matrix, Invadopodia, breast cancer, metastasis, cell survival

34 **Running title:** Silence BST-2 to reduce metastasis

35

36

37

38

39

40

41

42

43

44

45

46

47

48

49

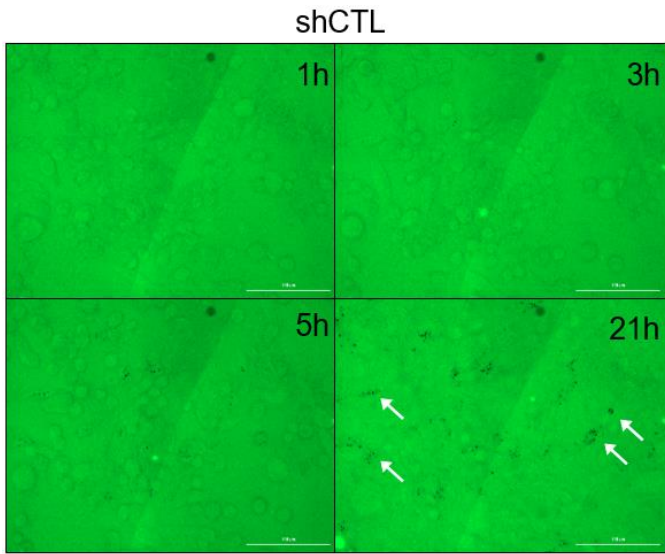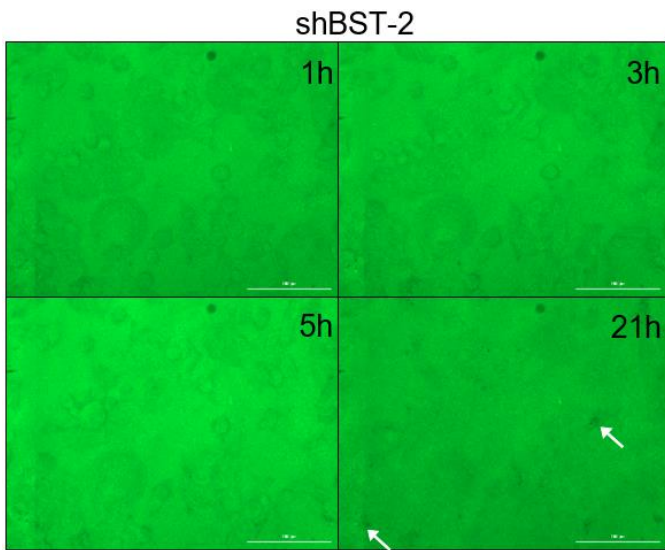

50  
51  
52 **Supplemental Figure 1. Representative time lapse images of invadopodia formation:** Images of green  
53 fluorescent gelatin were taken at 20x magnification with the Lionheart FX Live-cell imaging microscope. Bar =  
54 100  $\mu$ m. Arrows point to areas of matrix proteolysis (black holes).
